# Supplementary material
Source: PubMed Central journal article supplement (PMC8710234)
Supplement: NIHMS1759992-supplement-Table_S1.pdf [file NIHMS1759992-supplement-Table_S1.pdf]

| Patient Characteristic                 |                  | Quartile of Neighborhood Disadvantage Index                                               |                  |                       |                                    | p-value |
|----------------------------------------|------------------|-------------------------------------------------------------------------------------------|------------------|-----------------------|------------------------------------|---------|
|                                        |                  | Quartile 1<br>(Least Disadvantaged)                                                       | Quartile 2       | Quartile 3            | Quartile 4<br>(Most Disadvantaged) |         |
|                                        | Overall          | <0.73                                                                                     | 0.73 to <1.28    | 1.28 to <1.96         | ≥1.96                              |         |
| Age at diagnosis, median (IQR)         | 29.3 (6.9)       | 32.0 (27.0-36.0)                                                                          | 31.0 (27.0-34.0) | 27 (21.8-31.5)        | 28.0 (23.0-32.0)                   | 0.002   |
| Black/African American race, n (%)     | 121 (55.0)       | 10 (16.1)                                                                                 | 22 (41.6)        | 42 (80.8)             | 47 (88.7)                          | <0.001  |
| Pre-pregnancy hypertension, n (%)      | 80 (36.4)        | 23 (37.1)                                                                                 | 14 (26.4)        | 22 (42.3)             | 21 (39.6)                          | 0.345   |
| Twin pregnancy, n(%)                   | 28 (12.7)        | 8 (12.9)                                                                                  | 12 (22.6)        | 3 (5.8)               | 5 (9.4)                            | 0.058   |
| Day of diagnosis, median (IQR)         | 7.0 (1.0-28.0)   | 6.0 (2.0-15.0)                                                                            | 5.0 (1.0-26.0)   | 7.0 (2.0-38.0)        | 15.5 (2.0-35.0)                    | 0.397   |
| Timing of diagnosis                    |                  |                                                                                           |                  |                       |                                    | 0.365   |
| Prepartum                              | 24 (10.9)        | 5 (8.1)                                                                                   | 6 (11.3)         | 6 (11.5)              | 7 (13.2)                           |         |
| <30 days postpartum                    | 150 (68.2)       | 49 (79.0)                                                                                 | 37 (69.8)        | 33 (63.5)             | 31 (58.5)                          |         |
| ≥30 days postpartum                    | 46 (20.9)        | 8 (12.9)                                                                                  | 10 (18.9)        | 13 (25.0)             | 15 (28.3)                          |         |
| Lowest ejection fraction, median (IQR) | 22.5 (15.0-35.0) | 30 (17.5-37.5)                                                                            | 26.3 (15.0-35.0) | 20.0 (12.5-30.0)      | 17.5 (12.5-37.5)                   | 0.270   |
| Patient Characteristic                 |                  | Quartile of Median Household Income for Block Group                                       |                  |                       |                                    | p-value |
|                                        |                  | Quartile 4<br>(Least Disadvantaged)                                                       | Quartile 3       | Quartile 2            | Quartile 1<br>(Most Disadvantaged) |         |
|                                        |                  | Overall                                                                                   | ≥\$75,649        | \$46,266 to <\$75,649 | \$26,466 to <\$46,266              |         |
| Age at diagnosis, median (IQR)         | 29.3 (6.9)       | 33.0 (30.0-36.0)                                                                          | 30.0 (25.0-34.0) | 29.0 (22.0-32.0)      | 27.5 (23.0-31.0)                   | <0.001  |
| Black/African American race, n (%)     | 121 (55.0)       | 6 (11.1)                                                                                  | 22 (40.0)        | 43 (75.4)             | 50 (92.6)                          | <0.001  |
| Pre-pregnancy hypertension, n (%)      | 80 (36.4)        | 22 (40.7)                                                                                 | 16 (29.1)        | 26 (45.6)             | 16 (29.6)                          | 0.182   |
| Twin pregnancy, n(%)                   | 28 (12.7)        | 10 (18.5)                                                                                 | 10 (18.2)        | 4 (7.0)               | 4 (7.4)                            | 0.104   |
| Day of diagnosis, median (IQR)         | 7.0 (1.0-28.0)   | 5.0 (1.0-12.0)                                                                            | 9.0 (2.0-61.0)   | 7.0 (1.0-24.0)        | 7 (0.5-36.5)                       | 0.320   |
| Timing of diagnosis                    |                  |                                                                                           |                  |                       |                                    | 0.125   |
| Prepartum                              | 24 (10.9)        | 4 (7.4)                                                                                   | 3 (5.5)          | 9 (15.8)              | 8 (14.8)                           |         |
| <30 days postpartum                    | 150 (68.2)       | 42 (77.8)                                                                                 | 39 (70.9)        | 39 (68.4)             | 30 (55.6)                          |         |
| ≥30 days postpartum                    | 46 (20.9)        | 8 (14.8)                                                                                  | 13 (223.6)       | 9 (15.8)              | 16 (29.6)                          |         |
| Lowest ejection fraction, median (IQR) | 22.5 (15.0-35.0) | 35.0 (25.0-40.0)                                                                          | 20.2 (12.5-33.8) | 20.0 (12.5-35.0)      | 17.5 (12.5-32.5)                   | 0.005   |
| Patient Characteristic                 |                  | Quartile of Proportion of Residents with Lower than High School Education for Block Group |                  |                       |                                    | p-value |
|                                        |                  | Quartile 1                                                                                | Quartile 2       | Quartile 3            | Quartile 4                         |         |
|                                        |                  | Overall                                                                                   | <5.4%            | 5.4% to <12.1%        | 12.1% to <22.3%                    |         |
| Age at diagnosis, median (IQR)         | 29.3 (6.9)       | 31.0 (28.0-35.0)                                                                          | 31.0 (26.5-33.5) | 28.0 (24.0-32.0)      | 27.0 (22.0-34.0)                   | 0.006   |
| Black/African American race, n (%)     | 121 (55.0)       | 13 (23.6)                                                                                 | 19 (33.9)        | 41 (74.6)             | 48 (88.9)                          | <0.001  |
| Pre-pregnancy hypertension, n (%)      | 80 (36.4)        | 19 (35.6)                                                                                 | 19 (33.9)        | 21 (38.2)             | 21 (38.9)                          | 0.929   |
| Twin pregnancy, n(%)                   | 28 (12.7)        | 7 (12.7)                                                                                  | 14 (25.0)        | 4 (7.3)               | 3 (5.6)                            | 0.009   |
| Day of diagnosis, median (IQR)         | 7.0 (1.0-28.0)   | 5.0 (1.0-12.0)                                                                            | 7.0 (1.0-26.0)   | 8.0 (2.0-45.0)        | 9.0 (1.0-35.0)                     | 0.506   |
| Timing of diagnosis                    |                  |                                                                                           |                  |                       |                                    | 0.614   |
| Prepartum                              | 24 (10.9)        | 7 (12.7)                                                                                  | 4 (7.1)          | 6 (10.9)              | 7 (13.0)                           |         |
| <30 days postpartum                    | 150 (68.2)       | 40 (72.7)                                                                                 | 41 (73.2)        | 37 (67.3)             | 32 (59.3)                          |         |
| ≥30 days postpartum                    | 46 (20.9)        | 8 (14.6)                                                                                  | 11 (19.6)        | 12 (21.8)             | 15 (27.8)                          |         |
| Lowest ejection fraction, median (IQR) | 22.5 (15.0-35.0) | 31.3 (20.0-37.5)                                                                          | 27.5 (12.5-37.0) | 20.0 (10.0-33.8)      | 17.5 (12.5-35.0)                   | 0.123   |
