# Supplementary material
Source: PubMed Central journal article supplement (PMC8710234)
Supplement: NIHMS1759992-supplement-Table_S2.pdf [file NIHMS1759992-supplement-Table_S2.pdf]

|                                                                                                                                                                                      | Crude RR<br>(95% CI) | p-value | Adjusted RR<br>(M1)  | p-value | Adjusted RR<br>(M2)  | p-value | Adjusted RR<br>(M3)  | p-value | Adjusted RR<br>(M4)  | p-value | Adjusted RR<br>(M5)  | p-value |
|--------------------------------------------------------------------------------------------------------------------------------------------------------------------------------------|----------------------|---------|----------------------|---------|----------------------|---------|----------------------|---------|----------------------|---------|----------------------|---------|
| <b><u>Outcome: End Recovery</u></b>                                                                                                                                                  |                      |         |                      |         |                      |         |                      |         |                      |         |                      |         |
| Black race                                                                                                                                                                           | 0.70<br>(0.55, 0.88) | 0.002   | 0.70 (0.55,<br>0.88) | 0.002   | 0.82<br>(0.62, 1.09) | 0.170   | 0.78<br>(0.60, 1.01) | 0.054   | 0.76<br>(0.59, 0.99) | 0.038   | 0.70<br>(0.55, 0.90) | 0.005   |
| Disorganization Index                                                                                                                                                                | 0.77 (0.66,<br>0.90) | 0.001   | 0.81 (0.64,<br>1.03) | 0.900   | 0.84<br>(0.69, 1.03) | 0.091   |                      |         |                      |         |                      |         |
| > 15% adults with less than HS education                                                                                                                                             | 0.69<br>(0.52, 0.91) | 0.009   | 0.69<br>(0.52, 0.92) | 0.010   | 0.78<br>(0.57, 1.07) | 0.128   |                      |         |                      |         |                      |         |
| >32% Renter Occupied Housing                                                                                                                                                         | 0.68<br>(0.53, 0.87) | 0.002   | 0.69<br>(0.54, 0.88) | 0.003   | 0.75<br>(0.59, 0.96) | 0.020   |                      |         |                      |         |                      |         |
| >25% HH w. annual income below poverty line                                                                                                                                          | 0.88<br>(0.65, 1.18) | 0.381   | 0.85<br>(0.64, 1.14) | 0.275   | 0.97<br>(0.71, 1.33) | 0.857   |                      |         |                      |         |                      |         |
| >31% Female Headed Households                                                                                                                                                        | 0.88<br>(0.65, 1.18) | 0.381   | 0.89<br>(0.67, 1.18) | 0.427   | 1.11<br>(0.80, 1.64) | 0.463   |                      |         |                      |         |                      |         |
| >16% adults unemployed                                                                                                                                                               | 0.88<br>(0.65, 1.18) | 0.382   | 0.84<br>(0.63, 1.11) | 0.212   | 1.00<br>(0.73, 1.37) | 0.991   |                      |         |                      |         |                      |         |
| >10% adults on public assistance                                                                                                                                                     | 0.88<br>(0.65, 1.18) | 0.382   | 0.84<br>(0.63, 1.12) | 0.234   | 1.03<br>(0.74, 1.44) | 0.859   |                      |         |                      |         |                      |         |
| >28% with residential tenure less than 1 year                                                                                                                                        | 0.92<br>(0.69, 1.22) | 0.562   | 0.87<br>(0.66, 1.15) | 0.337   | 0.98<br>(0.74, 1.30) | 0.882   |                      |         |                      |         |                      |         |
| M1 = adjusted age and twin pregnancy                                                                                                                                                 |                      |         |                      |         |                      |         |                      |         |                      |         |                      |         |
| M2 = race model adjusted for age, twin pregnancy, and neighborhood concentrated disadvantage index (NDI); Models for area-based exposures adjusted for age, twin pregnancy, and race |                      |         |                      |         |                      |         |                      |         |                      |         |                      |         |
| M3 = race model adjusted for age, twin pregnancy, and neighborhood-based low education                                                                                               |                      |         |                      |         |                      |         |                      |         |                      |         |                      |         |
| M4 = race model adjusted for age, twin pregnancy, and neighborhood-based high renter occupied housing                                                                                |                      |         |                      |         |                      |         |                      |         |                      |         |                      |         |
| M5 = race model adjusted for age, twin pregnancy, and neighborhood-based low income                                                                                                  |                      |         |                      |         |                      |         |                      |         |                      |         |                      |         |
